# Supplementary material for: Bracing for the next pandemic: A qualitative One Health study of stakeholders’ and communities’ perspectives on infectious disease risks and prevention on Aruba
Source: Research Square preprint supplement (doi:10.21203/rs.3.rs-8335982/v1), 2026-01-19
Supplement: Supplementary file 2 [file 32950b2bbd60a480ffb5d1db.pdf]

# Supplementary file 3:

## Additional Results

### Supplement to:

Bracing for the next pandemic: Stakeholders and communities' perspectives on infectious disease risks and prevention on Aruba

### Authors

Debby Pluijmert<sup>1</sup>, Kimberly M. Grêaux<sup>2</sup>, Judelca Briceno<sup>3</sup>, Wilmer Salazar<sup>3</sup>, Verenuska Rincon<sup>3</sup>, Riem van den Berg<sup>3</sup>, Nathalie Maduro<sup>4</sup>, Anselmo Mathew<sup>3</sup>, Eugene Maduro<sup>3</sup>, Luis Chong<sup>3</sup>, Clariene Croes<sup>3</sup>, Esther Vermeulen<sup>3</sup>, Natalie V.S. Vinkeles Melchers<sup>1</sup>

### Affiliations

1. Health & Society, Social Sciences Department, Wageningen University & Research, Hollandseweg 1, 6706 KN Wageningen, the Netherlands.
2. Faculty of Hospitality and Tourism Management Studies, University of Aruba, J. Irausquinplein 4, Oranjestad, Aruba.
3. Department of Public Health (DVG) Aruba, Caya Ing. R.H. Lacle 4, Oranjestad, Aruba.
4. Santa Rosa, Department of Agriculture, Livestock and Fishery, Piedra Plat 114-A, Paradera, Aruba.

### Correspondence to:

*Natalie V.S. Vinkeles Melchers, PhD. MSc. MPH.*

Health & Society, Social Sciences Department, Wageningen University & Research, Wageningen, The Netherlands

**Email:** [natalie.vinkelesmelchers@wur.nl](mailto:natalie.vinkelesmelchers@wur.nl)



## Table of Contents

|           |                                         |          |
|-----------|-----------------------------------------|----------|
| <b>1.</b> | <b>PARTICIPANT CHARACTERISTICS.....</b> | <b>3</b> |
|           | Community members .....                 | 3        |
|           | Stakeholders.....                       | 3        |



## 1. Participant characteristics

### Community members

Younger participants (18-21 years) formed the largest group (n=5) and were the most geographically dispersed, residing in San Nicolas, Noord, Seroe Blanco, and Oranjestad. Representation was lower in the middle-aged groups (22-26 years: n=4; 27-45 years: n=2; 46-60 years: n=3), located in Santa Cruz, Paradera, San Nicolas, Oranjestad, and Savaneta. Older participants (60-80 years, n=4) and those with unknown age (n=2) were concentrated in Oranjestad and Santa Cruz. Overall, participants came from seven neighbourhoods, with Oranjestad, San Nicolas, and Santa Cruz being represented across the most age groups (**Table S1**).

**Table S1. Overview of community participants by age range and neighbourhood.**

| Age range    | Number of participants | Neighbourhood                                |
|--------------|------------------------|----------------------------------------------|
| 18 – 21      | 5                      | San Nicolas, Noord, Seroe Blanco, Oranjestad |
| 22 – 26      | 4                      | Santa Cruz, Paradera, San Nicolas            |
| 27 – 45      | 2                      | Oranjestad                                   |
| 46 – 60      | 3                      | Santa Cruz, Paradera, Savaneta               |
| 60 – 80      | 4                      | Oranjestad, Santa Cruz                       |
| Unknown      | 2                      | Oranjestad, Santa Cruz                       |
| <b>Total</b> | <b>20</b>              |                                              |

### Stakeholders

The stakeholder engagement involved **26 participants** representing **11 organisations**. As shown in **Figure S1**, stakeholders represented various sectors, including human health (58%), animal health (27%), and environmental health (15%). As shown in **Table S2**, the Department of Public Health contributed the most participants (n=9). Other key organisations included: Horacio Oduber Hospital (n=3), waste management companies (n=3), the Department of Agriculture, Livestock & Fishery (n=3), pest control (n=2), and the International Organisation for Migration (n=2). Single participants represented an international humanitarian organisation, a veterinary clinic, the National Park, and the Bureau City Inspector. One occupation (Serlimar waste management) remained unspecified.



**Figure S1.** Distribution of stakeholders contributing to the study, with primary professional field of work across the various One Health disciplines (human, animal, environment).

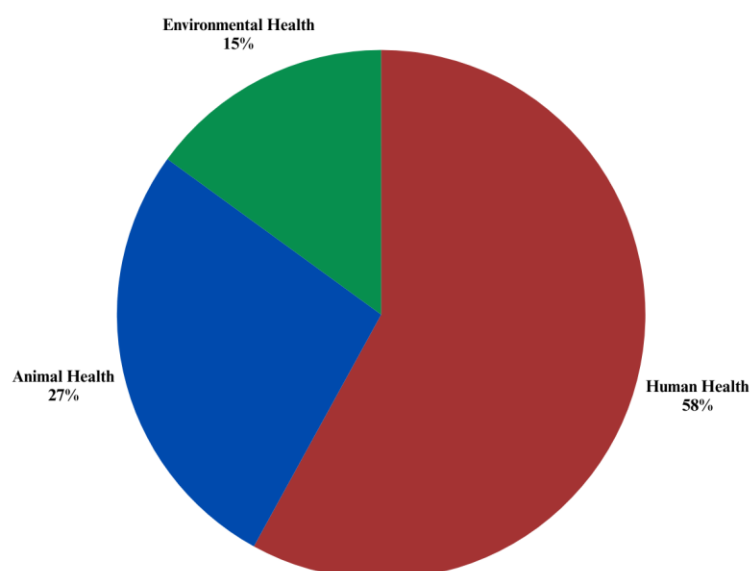

**Table S2.** Overview of stakeholder participants by organisation and occupation.

| Organisation                                   | Number of participants | Occupation                                                                                                                                                                                                                                                                                                     |
|------------------------------------------------|------------------------|----------------------------------------------------------------------------------------------------------------------------------------------------------------------------------------------------------------------------------------------------------------------------------------------------------------|
| Department of agriculture, livestock & fishery | 3                      | <ul style="list-style-type: none"> <li>• Consultant</li> <li>• Admin and finance</li> </ul>                                                                                                                                                                                                                    |
| Department of Public Health (PHD)              | 9                      | <ul style="list-style-type: none"> <li>• Department of service</li> <li>• Policy officer</li> <li>• Public health nurse</li> <li>• Department services of infection revenues</li> <li>• Vector control management</li> <li>• Epidemiologist</li> <li>• Medical specialist</li> <li>• Policy advisor</li> </ul> |
| International organisation for migration (IOM) | 2                      | <ul style="list-style-type: none"> <li>• Project coordinator</li> <li>• Physician</li> </ul>                                                                                                                                                                                                                   |
| International humanitarian aid organisation    | 1                      | <ul style="list-style-type: none"> <li>• Department social partners</li> </ul>                                                                                                                                                                                                                                 |
| Veterinary clinic                              | 1                      | <ul style="list-style-type: none"> <li>• Veterinarian</li> </ul>                                                                                                                                                                                                                                               |
| Horacio Oduber Hospital                        | 3                      | <ul style="list-style-type: none"> <li>• Infection control practitioner</li> <li>• Infection research specialist</li> <li>• Microbiology/laboratory</li> </ul>                                                                                                                                                 |
| Waste management (Ecotech)                     | 2                      | <ul style="list-style-type: none"> <li>• Operations manager</li> <li>• Operations coordinator</li> </ul>                                                                                                                                                                                                       |



|                             |   |                                                                                       |
|-----------------------------|---|---------------------------------------------------------------------------------------|
| Waste management (Serlimar) | 1 | <ul style="list-style-type: none"> <li>• Occupation not clarified</li> </ul>          |
| Pest control                | 2 | <ul style="list-style-type: none"> <li>• Co-worker</li> <li>• Supervisor</li> </ul>   |
| National Park               | 1 | <ul style="list-style-type: none"> <li>• Research and conservation manager</li> </ul> |
| Bureau City Inspector       | 1 | <ul style="list-style-type: none"> <li>• City inspector</li> </ul>                    |
